# Supplementary material
Source: publisher site journal article supplement (https://www.spandidos-publications.com/3858/downloadSupplementary)

Figure S1. Structures of the 26 active components in Mulberry leaf extract downloaded from the Traditional Chinese Medicine Systems Pharmacology database.

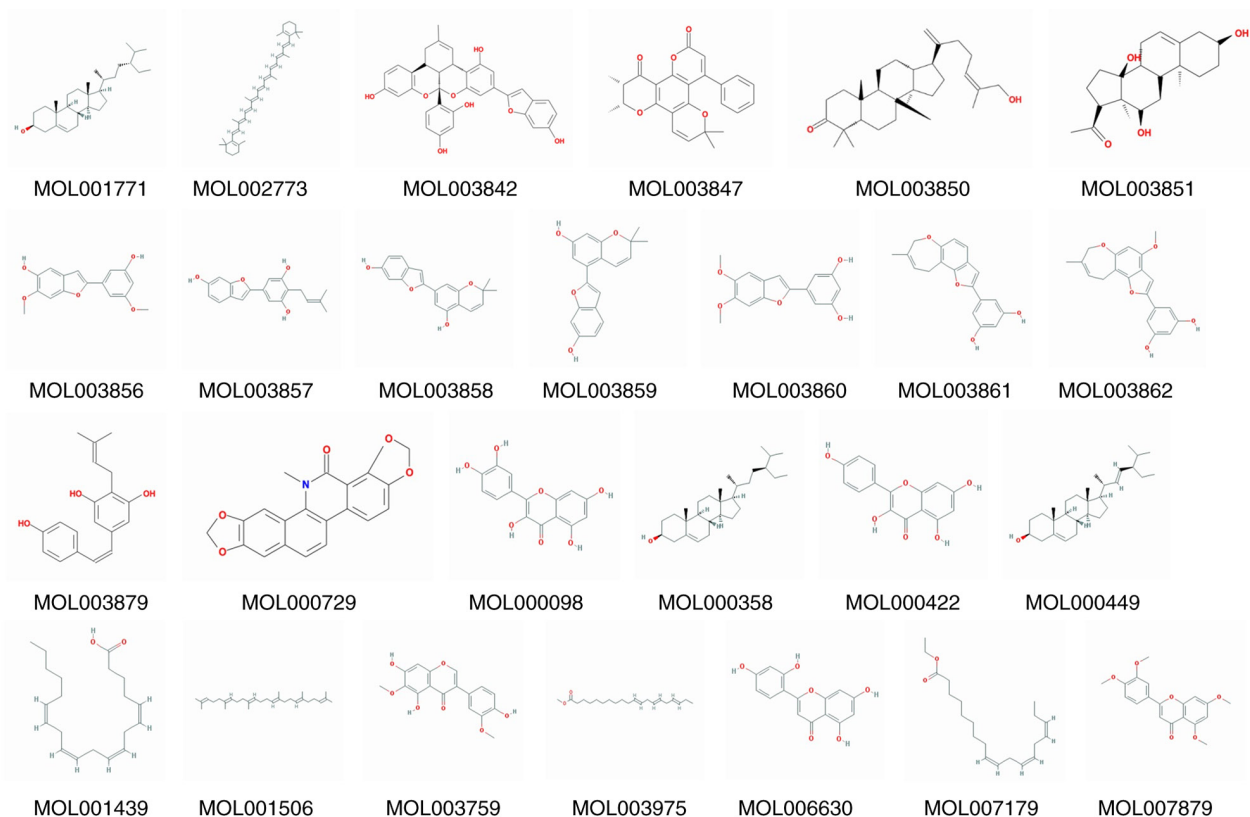

Supplement: Supplementary file 1 [file downloadSupplementary]
